# Supplementary material
Source: PubMed Central journal article supplement (PMC10152376)
Supplement: jamaneurol-e230932-s001.pdf [file jamaneurol-e230932-s001.pdf]

## Supplemental Online Content

Kang J, Eun Y, Jang W, et al. Rheumatoid arthritis and risk of Parkinson disease in Korea. *JAMA Neurol*. Published online May 1, 2023.  
doi:10.1001/jamaneurol.2023.0932

### **eMethods.** Covariates

**eTable 1.** Previous Studies on the Association Between Rheumatoid Arthritis (RA) and Incident Parkinson's Disease (PD)

**eTable 2.** Disease-Modifying Anti-Rheumatic Drugs Used in the Definition of These Diseases

**eTable 3.** List of Diseases in the Rare and Intractable Disease (RID) Program Excluded From the Study

**eTable 4.** Registration Criteria for Parkinson's Disease in the Rare and Intractable Disease (RID) Program of Korea

**eTable 5.** Sensitivity Analysis Evaluating the Risk of Parkinson's Disease According to RA Status and Serologic Status of RA With 2-, 3-, and 5-Year Lag Periods.

**eTable 6.** Stratified analyses of the association Between Rheumatoid Arthritis (RA) Status and Parkinson's Disease (PD) Risk by Socioeconomic Characteristics, Health Behaviors, and Comorbidities

**eTable 7.** Stratified Analyses of the Association Between Serologic Status of Rheumatoid Arthritis (RA) and Parkinson's Disease (PD) Risk by Socioeconomic Characteristics, Health Behaviors, and Comorbidities

**eTable 8.** The Association of Rheumatoid Arthritis (RA) and Its Seropositivity With the Risk of Parkinson's Disease According to Female Reproductive Factors

**eTable 9.** Exploratory Analysis Evaluating the risk of Parkinson's Disease According to Exposure to Conventional Synthetic DMARDs (csDMARDs) Biologic DMARDs (bDMARDs), and Target-Specific DMARDs (tsDMARDs)

**eTable 10.** Comparison of baseline characteristics between participants and Non-Participants of the Health Checkup Within 2 Years From the Index Date

This supplemental material has been provided by the authors to give readers additional information about their work.

## eMethods. Covariates

Information on anthropometric and health behaviors was collected using an NHSP self-administered questionnaire. Measurements of height (m<sup>2</sup>) and weight (kg) were performed by healthcare personnel during the health screening examination. Body mass index was calculated as kg/m<sup>2</sup>, and further categorized into five groups (< 18.5, 18.5-22.9, 23.0-24.9, 25.0-29.9, and ≥ 30 kg/m<sup>2</sup>) according to the criteria for Asian populations.<sup>1</sup> Because insurance payment was determined based on household income level, insurance premium was used as a proxy for income, and we defined low income as the lower 25% of insurance payers and Medicaid group. Smoking status was categorized into non-smoker, former smoker < 20 pack-years, former smoker ≥ 20 pack-years, current smoker < 20 pack-years, and current smoker ≥ 20 pack-years<sup>2</sup>. Alcohol consumption was categorized into non-drinker, <30 g/day, and ≥30 g/day<sup>3</sup>. Regular physical activity was defined as participants engaged in moderate exercise for at least 30 minutes 5 times per week or strenuous exercise for at least 20 minutes 3 times per week.

Comorbidities were defined using NHIS claim data and laboratory information from NHSP in a complementary fashion. We defined diabetes mellitus as a record of diagnosis code (E11.x–E14.x) with antidiabetic medications or a fasting plasma glucose ≥ 126 mg/dL. Hypertension was defined with ICD-10 codes (I10.x-I13.x and I15.x) or being on antihypertensive agents or blood pressure ≥ 140/90 mmHg. Dyslipidemia was defined as a combination of ICD-10 codes (E78.x) and a prescription record for lipid-lowering medications or total cholesterol ≥240 mg/dL. Chronic kidney disease (CKD) was determined using ICD-10 codes (N18.x,19.x) or eGFR calculated by the Modification of Diet in Renal Disease equation (<60 mg/dL).<sup>4</sup> Myocardial infarction (MI, I21.x–I22.x), depression (F32.x–I33.x), and stroke (I63.x–I64.x) were defined based on diagnosis code and claim data for brain CT and/or MRI was additionally required to validate a stroke only.

## eReferences

1. Anuurad E, Shiwaku K, Nogi A, et al. The new BMI criteria for asians by the regional office for the western pacific region of WHO are suitable for screening of overweight to prevent metabolic syndrome in elder Japanese workers. *J Occup Health*. 2003;45(6):335-343.
2. Sin S, Lee CH, Choi SM, Han KD, Lee J. Metabolic Syndrome and Risk of Lung Cancer: An Analysis of Korean National Health Insurance Corporation Database. *J Clin Endocrinol Metab*. 2020;105(11).
3. Yoo JE, Shin DW, Han K, et al. Association of the frequency and quantity of alcohol consumption with gastrointestinal cancer. *JAMA network open*. 2021;4(8):e2120382-e2120382.
4. Imai E, Horio M, Nitta K, et al. Estimation of glomerular filtration rate by the MDRD study equation modified for Japanese patients with chronic kidney disease. *Clin Exp Nephrol*. 2007;11(1):41-50.

**eTable 1. Previous Studies on the Association Between RA and Incident PD**

| Reference                 | Study population                                              | Study design                                            | Sample size                              | Follow-up | Definition of RA                                      | Outcome definition                                                                 | Covariates                                                                                                                        | Key findings                | limitations                                                                                                                                                                                                                                                                           |
|---------------------------|---------------------------------------------------------------|---------------------------------------------------------|------------------------------------------|-----------|-------------------------------------------------------|------------------------------------------------------------------------------------|-----------------------------------------------------------------------------------------------------------------------------------|-----------------------------|---------------------------------------------------------------------------------------------------------------------------------------------------------------------------------------------------------------------------------------------------------------------------------------|
| Rugbjerg, K., et al, 2009 | Danish National Hospital Register                             | Case-control                                            | PD =13,695<br>RA =519<br>RA&PD = 63      | 1986-2006 | ICD8 and 10 codes                                     | ICD-8 code 342 and ICD-10 code G20)                                                | Presence of COPD                                                                                                                  | aOR 0.7 (95% CI 0.5–0.9)    | - Smoking status was not taken into consideration<br>- RA was solely defined using disease codes<br>- Seropositivity on the development of PD has not been evaluated                                                                                                                  |
| Li, X., et al, 2012       | Swedish Hospital Discharge Register                           | Retrospective cohort study                              | PD = 26,791<br>RA = 52,994?<br>RA&PD =63 | 1964-2007 | ICD codes                                             | ICD-7: code 350, ICD-8: code 342.0, ICD-9: code 332, and ICD-10: codes G20 and G21 | Gender, age, period, socioeconomic status, geographic region of residence, and comorbidities.                                     | SIR 1.07 (95% CI 0.89–1.26) | - Smoking status was not taken into consideration<br>- RA was solely defined using disease codes<br>- Seropositivity on the development of PD has not been evaluated                                                                                                                  |
| Sung, Y., et al, 2016,    | Taiwan National Health Insurance Research Database            | age- and sex-matched retrospective cohort               | RA = 33,221<br>PD =2,741<br>RA&PD = 360  | 1998-2010 | ICD 9 code (CM 714.0) + critical illness registration | ICD-9 (CM 332) + Registry for Catastrophic Illness Patient Database                | Sex, age, and comorbidities, namely, diabetes, hypertension, hyperlipidemia, CAD, head injury, depression, stroke, and NSAID use. | aHR 0.65 (95% CI 0.58-0.73) | - Smoking status was not taken into consideration<br>- Seropositivity on the development of PD has not been evaluated<br>- A lag period of PD incidence was not applied                                                                                                               |
| Chang, C., et al 2017,    | National Health Insurance Research Database (NHIRD) of Taiwan | age-, sex-, and index year matched retrospective cohort | RA =19,542<br>PD =2,664<br>RA & PD =379  | 2001-2012 | ICD 9 code (CM 714.0) + critical illness registration | ICD 9 code (CM 332) + hospitalization/or three times outpatients visit.            | Age, sex, and comorbidities                                                                                                       | aHR1.14 (95% CI 1.03–1.2)   | - Smoking status was not taken into consideration<br>- Seropositivity on the development of PD has not been evaluated<br>- A lag period of PD incidence was not applied                                                                                                               |
| Bacelis, J., et al 2021   | National patient registry of Sweden                           | Nested Case-Control Study                               | RA = 8256<br>PD = 21876<br>RA & PD =66   | 1997–2016 | ICD 10 code (M05 or M06)                              | ICD 10 code (G21)                                                                  | N/A                                                                                                                               | OR 0.66 (95% CI 0.51, 0.85) | - Smoking status was not taken into consideration<br>- RA was solely defined using disease codes<br>- Seropositivity on the development of PD has not been evaluated<br>- All participants were first-degree relatives of a person diagnosed with diabetes mellitus or celiac disease |

PD: Parkinson disease; RA: Rheumatoid arthritis; ICD: international classification of disease; COPD: chronic obstructive pulmonary disease; aOR: adjusted odds ratio; CI: confidence interval; SIR: Standardized incidence ratio; aHR: adjusted hazard ratio; OR: odds ratio; N/A: not available

**eTable 2. Disease-Modifying Anti-Rheumatic Drugs Used in the Definition of Diseases.**

| Category | Drugs                                                                                                                                                       |
|----------|-------------------------------------------------------------------------------------------------------------------------------------------------------------|
| csDMARD  | Methotrexate, Hydroxychloroquine, Leflunomide, Sulfasalazine, Tacrolimus, Cyclosporine, D-penicillamine, Bucillamine, Azathioprine, Minocycline, Mizoribine |
| bDMARD   | Adalimumab, Etanercept, Infliximab, Golimumab, Rituximab, Abatacept, Tocilizumab                                                                            |
| tsDMARD  | Tofacitinib                                                                                                                                                 |

csDMARD, conventional synthetic disease-modifying anti-rheumatic drug; bDMARD, biologic disease-modifying anti-rheumatic drug; tsDMARD, targeted synthetic disease-modifying anti-rheumatic drug

**eTable 3. List of Diseases in the Rare and Intractable (RID) Program Excluded From the Study**

| RID code | Disease                                                                                                                                                                  |
|----------|--------------------------------------------------------------------------------------------------------------------------------------------------------------------------|
| V111     | Sarcoidosis                                                                                                                                                              |
| V133     | Juvenile idiopathic arthritis                                                                                                                                            |
| V134     | Polyarteritis nodosa, Eosinophilic granulomatosis with polyangiitis, Juvenile polyarteritis                                                                              |
| V135     | Goodpasture's syndrome, Thrombotic thrombocytopenic purpura, Thrombotic microangiopathy, Granulomatosis with polyangiitis, Takayasu's arteritis                          |
| V136     | Systemic lupus erythematosus                                                                                                                                             |
| V137     | Inflammatory myositis                                                                                                                                                    |
| V138     | Systemic sclerosis                                                                                                                                                       |
| V139     | Sjogren's syndrome, Mixed connective tissue disease, Behcet's disease, Polymyalgia rheumatic, Eosinophilic fasciitis, Multifocal fibrosclerosis, Weber-Christian disease |
| V140     | Ankylosing spondylitis                                                                                                                                                   |
| V178     | Relapsing polychondritis                                                                                                                                                 |
| V237     | Psoriatic arthritis                                                                                                                                                      |
| V238     | Microscopic polyangiitis                                                                                                                                                 |
| V290     | Hypersensitivity vasculitis                                                                                                                                              |
| V294     | Cryoglobulinemic vasculitis                                                                                                                                              |
| V298     | Adult onset Still's disease                                                                                                                                              |
| V900     | Extremely rare diseases including IgG4-related disease, SAPHO syndrome                                                                                                   |

**eTable 4. Registration Criteria for Parkinson’s Disease in the Rare and Intractable (RID) Program of Korean**

| Registration criteria | Disease                                                                                                                                                                                                                                                                                                                                                                                                                                                                                                                                                                                                                                                                                                                                                                                                                                                                                                                    |
|-----------------------|----------------------------------------------------------------------------------------------------------------------------------------------------------------------------------------------------------------------------------------------------------------------------------------------------------------------------------------------------------------------------------------------------------------------------------------------------------------------------------------------------------------------------------------------------------------------------------------------------------------------------------------------------------------------------------------------------------------------------------------------------------------------------------------------------------------------------------------------------------------------------------------------------------------------------|
| Step 1                | <p>Diagnosis of Parkinsonism</p> <p>Mild or greater bradykinesia</p> <p>Plus at least one of the followings</p> <ul style="list-style-type: none"> <li>- Muscular rigidity</li> <li>- 4-6 Hz rest tremor</li> <li>- Postural instability not caused by primary visual, vestibular, cerebellar, or proprioceptive dysfunction</li> </ul>                                                                                                                                                                                                                                                                                                                                                                                                                                                                                                                                                                                    |
| Step 2                | <p>Exclusion criteria for Parkinson’s disease</p> <ul style="list-style-type: none"> <li>- History of repeated strokes with stepwise progression of parkinsonian features</li> <li>- History of repeated head injury</li> <li>- History of definite encephalitis</li> <li>- Oculogyric crises</li> <li>- Neuroleptic treatment at onset of symptoms</li> <li>- More than one affected relative</li> <li>- Sustained remission</li> <li>- Strictly unilateral features after 3 years</li> <li>- Supranuclear gaze palsy</li> <li>- Cerebellar signs</li> <li>- Early severe autonomic involvement</li> <li>- Early severe dementia with disturbances of memory, language, and praxis</li> <li>- Babinski sign</li> <li>- Presence of cerebral tumor or communication hydrocephalus on imaging study</li> <li>- Negative response to large doses of levodopa in absence of malabsorption</li> <li>- MPTP exposure</li> </ul> |
| Step 3                | <p>Three or more following criteria is required for diagnosis of Parkinson’s disease</p> <p>Unilateral onset</p> <ul style="list-style-type: none"> <li>- Rest tremor present</li> <li>- Progressive disorder</li> <li>- Persistent asymmetry affecting side of onset most</li> <li>- Excellent response (70-100%) to levodopa</li> <li>- Severe levodopa-induced chorea</li> <li>- Levodopa response for 5 years or more</li> <li>- Clinical course of ten years or more</li> </ul>                                                                                                                                                                                                                                                                                                                                                                                                                                       |

**eTable 5. Sensitivity Analysis Evaluating the Risk of Parkinson’s Disease According to RA Status and Serologic Status Of RA With 2-Year, 3-Year, and 5-Year Lag Periods.**

| Lag periods                            | 2-year lag period |          |                    | 3-year lag period |              |                    | 5-year lag period |              |                    |
|----------------------------------------|-------------------|----------|--------------------|-------------------|--------------|--------------------|-------------------|--------------|--------------------|
|                                        | N                 | Event(N) | HR (95% CI)        | N                 | Event<br>(N) | HR (95% CI)        | N                 | Event<br>(N) | HR (95% CI)        |
| <b>By RA status</b>                    |                   |          |                    |                   |              |                    |                   |              |                    |
| Control                                | 271,843           | 664      | 1 (Ref.)           | 229,645           | 511          | 1 (Ref.)           | 148,374           | 270          | 1 (Ref.)           |
| RA                                     | 53,995            | 221      | 1.63 (1.39 - 1.90) | 45,394            | 169          | 1.66 (1.39 - 1.98) | 29,014            | 83           | 1.61 (1.25 - 2.06) |
| <b>By RA status and seropositivity</b> |                   |          |                    |                   |              |                    |                   |              |                    |
| Control                                | 271,843           | 664      | 1 (Ref.)           | 229,645           | 511          | 1 (Ref.)           | 148,374           | 270          | 1 (Ref.)           |
| SNRA                                   | 15,526            | 37       | 0.98 (0.70 - 1.36) | 12,885            | 27           | 0.95 (0.64 - 1.40) | 8,384             | 10           | 0.70 (0.37 - 1.31) |
| SPRA                                   | 38,469            | 184      | 1.87 (1.59 - 2.21) | 32,509            | 142          | 1.93 (1.60 - 2.33) | 20,630            | 73           | 1.95 (1.50 - 2.54) |
| <b>By seropositivity</b>               |                   |          |                    |                   |              |                    |                   |              |                    |
| SNRA                                   | 15,526            | 37       | 1 (Ref.)           | 12,885            | 27           | 1 (Ref.)           | 8,384             | 10           | 1 (Ref.)           |
| SPRA                                   | 38,469            | 184      | 1.95 (1.34 - 2.73) | 32,509            | 142          | 2.05 (1.35 - 3.09) | 20,630            | 73           | 2.83 (1.46 - 5.49) |

aHR: adjusted hazard ratio; CI: confidence interval

Hazard ratio was calculated adjusting for age, sex, smoking, alcohol drinking, physical activity, low income, BMI, diabetes mellitus, hypertension, hyperlipidemia, chronic kidney disease myocardial infarction, stroke, and depression



**eTable 6. Stratified Analyses of Association Between Rheumatoid Arthritis (RA) Status and Parkinson Disease (PD) Risk by Socioeconomic Characteristics, Health Behaviors, and Comorbidities**

| Subgroup | RA status                | N       | Event (N) | Duration (PY) | Incidence rate (per 1,000 Person-years) | aHR (95% CI)       | <i>P</i> -interaction |      |
|----------|--------------------------|---------|-----------|---------------|-----------------------------------------|--------------------|-----------------------|------|
| Age      | 40-49                    | Control | 55,505    | 10            | 259,046.2                               | 0.04               | 1 (Ref.)              | .424 |
|          |                          | RA      | 11,101    | 7             | 51,735.4                                | 0.14               | 3.26 (1.24 - 8.57)    |      |
|          | 50-64                    | Control | 138,800   | 220           | 641,249.5                               | 0.34               | 1 (Ref.)              |      |
|          |                          | RA      | 27,760    | 81            | 127,386.0                               | 0.64               | 1.72 (1.33 - 2.22)    |      |
|          | 65-74                    | Control | 59,510    | 396           | 263,028.7                               | 1.51               | 1 (Ref.)              |      |
|          |                          | RA      | 11,902    | 133           | 50,748.6                                | 2.62               | 1.61 (1.32 - 1.96)    |      |
| ≥75      | Control                  | 19,585  | 177       | 74,456.6      | 2.38                                    | 1 (Ref.)           |                       |      |
|          | RA                       | 3,917   | 69        | 13,712.6      | 5.03                                    | 1.93 (1.46 - 2.56) |                       |      |
| Sex      | Male                     | Control | 68,670    | 257           | 296,732.7                               | 0.87               | 1 (Ref.)              | .343 |
|          |                          | RA      | 13,734    | 80            | 57,505.8                                | 1.39               | 1.57 (1.22 - 2.02)    |      |
|          | Female                   | Control | 204,730   | 546           | 941,048.4                               | 0.58               | 1 (Ref.)              |      |
|          |                          | RA      | 40,946    | 210           | 186,076.8                               | 1.13               | 1.82 (1.55 - 2.13)    |      |
| Income   | Low 25% + Medicaid group | Control | 64,191    | 165           | 287,507.6                               | 0.57               | 1 (Ref.)              | .995 |
|          |                          | RA      | 12,792    | 55            | 54,948.8                                | 1.00               | 1.75 (1.50 - 2.03)    |      |
|          | Above 25%                | Control | 209,209   | 638           | 950,273.4                               | 0.67               | 1 (Ref.)              |      |
|          |                          | RA      | 41,888    | 235           | 188,633.8                               | 1.25               | 1.74 (1.28 - 2.37)    |      |
| Smoking  | Never                    | Control | 217,978   | 663           | 998,687.1                               | 0.66               | 1 (Ref.)              | .295 |
|          |                          | RA      | 42,727    | 237           | 193,421.5                               | 1.23               | 1.76 (1.51 - 2.04)    |      |
|          | Ex-smoker + PY<20        | Control | 15,676    | 52            | 65,729.4                                | 0.79               | 1 (Ref.)              |      |
|          |                          | RA      | 3,234     | 20            | 13,499.8                                | 1.48               | 1.79 (1.07 - 3.01)    |      |
|          | Ex-smoker + PY≥20        | Control | 10,613    | 46            | 44,832.0                                | 1.03               | 1 (Ref.)              |      |
|          |                          | RA      | 2,685     | 15            | 10,877.5                                | 1.38               | 1.27 (0.71 - 2.28)    |      |
|          | Current smokers + PY<20  | Control | 14,633    | 24            | 63,406.9                                | 0.38               | 1 (Ref.)              |      |
|          |                          | RA      | 2,771     | 5             | 11,778.3                                | 0.43               | 1.03 (0.39 - 2.69)    |      |

|                     |                          |         |         |     |             |      |                    |      |
|---------------------|--------------------------|---------|---------|-----|-------------|------|--------------------|------|
|                     | Current + PY $\geq$ 20   | Control | 14,500  | 18  | 65,125.7    | 0.28 | 1 (Ref.)           |      |
|                     |                          | RA      | 3,263   | 13  | 14,005.6    | 0.93 | 3.14 (1.54 - 6.41) |      |
| Alcohol consumption | None                     | Control | 193,905 | 651 | 886,847.6   | 0.73 | 1 (Ref.)           | .722 |
|                     |                          | RA      | 41,781  | 248 | 187,385.3   | 1.32 | 1.74 (1.50 - 2.02) |      |
|                     | Mild (<30 g/day)         | Control | 69,654  | 136 | 307,439.2   | 0.44 | 1 (Ref.)           |      |
|                     |                          | RA      | 11,422  | 36  | 49,934.0    | 0.72 | 1.66 (1.15 - 2.40) |      |
|                     | Heavy ( $\geq$ 30 g/day) | Control | 9,841   | 16  | 43,494.2    | 0.37 | 1 (Ref.)           |      |
|                     |                          | RA      | 1,477   | 6   | 6,263.4     | 0.96 | 2.52 (0.98 - 6.43) |      |
| Physical activity   | None                     | Control | 216,594 | 654 | 983,239.1   | 0.67 | 1 (Ref.)           | .740 |
|                     |                          | RA      | 44,653  | 240 | 199,388.9   | 1.20 | 1.72 (1.48 - 2.00) |      |
|                     | Regular                  | Control | 56,806  | 149 | 254,542.0   | 0.59 | 1 (Ref.)           |      |
|                     |                          | RA      | 10,027  | 50  | 44,193.8    | 1.13 | 1.83 (1.33 - 2.52) |      |
| Body mass index     | <18.5                    | Control | 7,237   | 23  | 31,247.6    | 0.74 | 1 (Ref.)           | .592 |
|                     |                          | RA      | 2,087   | 14  | 8,836.6     | 1.58 | 2.35 (1.21 - 4.56) |      |
|                     | 18.5–23                  | Control | 104,475 | 282 | 47,4189.0   | 0.60 | 1 (Ref.)           |      |
|                     |                          | RA      | 22,627  | 115 | 101,681.0   | 1.13 | 1.80 (1.45 - 2.24) |      |
|                     | 23–25                    | Control | 69,736  | 202 | 318,861.9   | 0.63 | 1 (Ref.)           |      |
|                     |                          | RA      | 13,340  | 60  | 60,000.2    | 1.00 | 1.47 (1.10 - 1.97) |      |
|                     | 25–30                    | Control | 81,260  | 264 | 367,212.3   | 0.72 | 1 (Ref.)           |      |
|                     |                          | RA      | 14,720  | 93  | 64,853.2    | 1.43 | 1.86 (1.47 - 2.36) |      |
|                     | $\geq$ 30                | Control | 10,692  | 32  | 46,270.2    | 0.69 | 1 (Ref.)           |      |
|                     |                          | RA      | 1,906   | 8   | 8,211.7     | 0.97 | 1.38 (0.63 - 2.99) |      |
| Diabetes            | No                       | Control | 236,982 | 622 | 1,08185,8.8 | 0.58 | 1 (Ref.)           | .546 |
|                     |                          | RA      | 47,289  | 229 | 213,299.4   | 1.07 | 1.78 (1.53 - 2.07) |      |
|                     | Yes                      | Control | 36,418  | 181 | 155,922.2   | 1.16 | 1 (Ref.)           |      |
|                     |                          | RA      | 7,391   | 61  | 30,283.2    | 2.01 | 1.61 (1.20 - 2.15) |      |
| Hypertension        | No                       | Control | 168,051 | 328 | 766,659.6   | 0.43 | 1 (Ref.)           | .976 |
|                     |                          | RA      | 31,684  | 112 | 143,253.1   | 0.78 | 1.74 (1.41 - 2.17) |      |
|                     | Yes                      | Control | 105,349 | 475 | 471,121.5   | 1.01 | 1 (Ref.)           |      |
|                     |                          | RA      | 22,996  | 178 | 100,329.6   | 1.77 | 1.74 (1.46 - 2.07) |      |

|                        |     |         |         |     |             |      |                    |      |
|------------------------|-----|---------|---------|-----|-------------|------|--------------------|------|
| Dyslipidemia           | No  | Control | 182,759 | 469 | 849,357.7   | 0.55 | 1 (Ref.)           | .669 |
|                        |     | RA      | 35,983  | 160 | 165,130.9   | 0.97 | 1.70 (1.42 - 2.03) |      |
|                        | Yes | Control | 90,641  | 334 | 388,423.3   | 0.86 | 1 (Ref.)           |      |
|                        |     | RA      | 18,697  | 130 | 78,451.7    | 1.66 | 1.80 (1.47 - 2.21) |      |
| Chronic kidney disease | No  | Control | 254,935 | 670 | 1152,241.2  | 0.58 | 1 (Ref.)           | .124 |
|                        |     | RA      | 49,961  | 248 | 222,982.2   | 1.11 | 1.82 (1.57 - 2.11) |      |
|                        | Yes | Control | 18,465  | 133 | 85,539.8    | 1.56 | 1 (Ref.)           |      |
|                        |     | RA      | 4,719   | 42  | 20,600.4    | 2.04 | 1.36 (0.96 - 1.92) |      |
| Myocardial infarction  | No  | Control | 271,910 | 795 | 1,23173,1.3 | 0.65 | 1 (Ref.)           | .448 |
|                        |     | RA      | 54,069  | 287 | 241,194.5   | 1.19 | 1.75 (1.53 - 2.01) |      |
|                        | Yes | Control | 1,490   | 8   | 6,049.7     | 1.32 | 1 (Ref.)           |      |
|                        |     | RA      | 611     | 3   | 2,388.1     | 1.26 | 1.04 (0.28 - 3.94) |      |
| Stroke                 | No  | Control | 271,978 | 787 | 1,231,588.9 | 0.64 | 1 (Ref.)           | .391 |
|                        |     | RA      | 54,167  | 284 | 241,456.2   | 1.18 | 1.76 (1.53 - 2.02) |      |
|                        | Yes | Control | 1,422   | 16  | 6,192.2     | 2.58 | 1 (Ref.)           |      |
|                        |     | RA      | 513     | 6   | 2,126.5     | 2.82 | 1.16 (0.45 - 2.96) |      |
| Depression             | No  | Control | 257,289 | 681 | 1,169,252.2 | 0.58 | 1 (Ref.)           | .356 |
|                        |     | RA      | 46,987  | 214 | 210,992.2   | 1.01 | 1.80 (1.54 - 2.10) |      |
|                        | Yes | Control | 16,111  | 122 | 68,528.8    | 1.78 | 1 (Ref.)           |      |
|                        |     | RA      | 7,693   | 76  | 32,590.4    | 2.33 | 1.55 (1.16 - 2.06) |      |

PY: person-years; aHR: adjusted hazard ratio; CI: confidence interval

Hazard ratio was calculated adjusting for age, sex, smoking, alcohol drinking, physical activity, low income, BMI, diabetes mellitus, hypertension, hyperlipidemia, chronic kidney disease myocardial infarction, stroke, and depression

**eTable 7. Stratified Analyses of Association Between Serologic Status of RA and Parkinson Disease (PD) Risk by Socioeconomic Characteristics, Health Behaviors, and Comorbidities**

| Subgroup | Serologic subtype        | N    | Event (N) | Duration (PY) | Incidence rate (per 1,000 PY) | aHR (95% CI) | <i>P</i> -interaction |      |
|----------|--------------------------|------|-----------|---------------|-------------------------------|--------------|-----------------------|------|
| Age      | 40-49                    | SNRA | 3,512     | 3             | 15,573.2                      | 0.19         | 1 (Ref.)              | .596 |
|          |                          | SPRA | 7,589     | 4             | 36,162.2                      | 0.11         | 1.52 (0.92 - 2.54)    |      |
|          | 50-64                    | SNRA | 8,117     | 16            | 36,488.4                      | 0.44         | 1 (Ref.)              |      |
|          |                          | SPRA | 19,643    | 65            | 90,897.6                      | 0.72         | 1.69(0.98 - 2.92)     |      |
|          | 65-74                    | SNRA | 3,096     | 25            | 13,267.2                      | 1.88         | 1 (Ref.)              |      |
|          |                          | SPRA | 8,806     | 108           | 37,481.4                      | 2.88         | 1.61(1.04 - 2.50)     |      |
|          | ≥75                      | SNRA | 945       | 12            | 3,475.2                       | 3.45         | 1 (Ref.)              |      |
|          |                          | SPRA | 2,972     | 57            | 10,237.4                      | 5.57         | 1.71(0.92 - 3.19)     |      |
| Sex      | Male                     | SNRA | 4,189     | 22            | 17,386.7                      | 1.27         | 1 (Ref.)              | .059 |
|          |                          | SPRA | 9,545     | 58            | 40,119.1                      | 1.45         | 1.08 (0.66 - 1.77)    |      |
|          | Female                   | SNRA | 11,481    | 34            | 51,417.3                      | 0.66         | 1 (Ref.)              |      |
|          |                          | SPRA | 29,465    | 176           | 134,659.5                     | 1.31         | 1.95 (1.35 - 2.82)    |      |
| Income   | Low 25% + Medicaid group | SNRA | 3,509     | 8             | 15,165.4                      | 0.53         | 1 (Ref.)              | .319 |
|          |                          | SPRA | 9,283     | 47            | 39,783.5                      | 1.18         | 2.27 (1.07 - 4.81)    |      |
|          | Above 25%                | SNRA | 12,161    | 48            | 53,638.6                      | 0.90         | 1 (Ref.)              |      |
|          |                          | SPRA | 29,727    | 187           | 134,995.2                     | 1.39         | 1.50 (1.09 - 2.06)    |      |
| Smoking  | Never                    | SNRA | 12,198    | 47            | 54,293.9                      | 0.87         | 1 (Ref.)              | N/A  |
|          |                          | SPRA | 30,529    | 190           | 139,127.6                     | 1.37         | 1.55 (1.13 - 2.14)    |      |
|          | Ex-smoker + PY<20        | SNRA | 1,161     | 5             | 4,707.7                       | 1.06         | 1 (Ref.)              |      |
|          |                          | SPRA | 2,073     | 15            | 8,792.1                       | 1.71         | 1.50 (0.54 - 4.12)    |      |
|          | Ex-smoker + PY≥20        | SNRA | 824       | 4             | 3,440.8                       | 1.16         | 1 (Ref.)              |      |
|          |                          | SPRA | 1,861     | 11            | 7,436.7                       | 1.48         | 1.18 (0.37 - 3.71)    |      |
|          | Current smokers + PY<20  | SNRA | 772       | 0             | 3,268.1                       | 0.00         | N/A                   |      |
|          |                          | SPRA | 1,999     | 5             | 8,510.2                       | 0.59         | N/A                   |      |

|                     |                          |      |        |     |           |      |                    |      |
|---------------------|--------------------------|------|--------|-----|-----------|------|--------------------|------|
|                     | Current + PY $\geq$ 20   | SNRA | 715    | 0   | 3,093.5   | 0.00 | N/A                |      |
|                     |                          | SPRA | 2,548  | 13  | 10,912.1  | 1.19 | N/A                |      |
| Alcohol consumption | None                     | SNRA | 11,755 | 43  | 52,009.3  | 0.83 | 1 (Ref.)           | .112 |
|                     |                          | SPRA | 30,026 | 205 | 135,376.0 | 1.51 | 1.82 (1.31 - 2.54) |      |
|                     | Mild (<30 g/day)         | SNRA | 3,454  | 10  | 14,898.1  | 0.67 | 1 (Ref.)           |      |
|                     |                          | SPRA | 7,968  | 26  | 35,035.8  | 0.74 | 1.05 (0.51 - 2.19) |      |
|                     | Heavy ( $\geq$ 30 g/day) | SNRA | 461    | 3   | 1,896.6   | 1.58 | 1 (Ref.)           |      |
|                     |                          | SPRA | 1,016  | 3   | 4,366.8   | 0.69 | 0.44 (0.09 - 2.17) |      |
| Physical activity   | None                     | SNRA | 12,588 | 40  | 55,379.3  | 0.72 | 1 (Ref.)           | .042 |
|                     |                          | SPRA | 32,065 | 200 | 144,009.5 | 1.39 | 1.88 (1.34 - 2.65) |      |
|                     | Regular                  | SNRA | 3,082  | 16  | 13,424.7  | 1.19 | 1 (Ref.)           |      |
|                     |                          | SPRA | 6,945  | 34  | 30,769.1  | 1.11 | 0.92 (0.51 - 1.68) |      |
| Body mass index     | <18.5                    | SNRA | 517    | 3   | 2,137.6   | 1.40 | 1 (Ref.)           | .452 |
|                     |                          | SPRA | 1,570  | 11  | 6,699.0   | 1.64 | 0.96 (0.27 - 3.46) |      |
|                     | 18.5–23                  | SNRA | 6,145  | 15  | 27,040.9  | 0.56 | 1 (Ref.)           |      |
|                     |                          | SPRA | 16,482 | 100 | 74,640.0  | 1.34 | 2.36 (1.37 - 4.06) |      |
|                     | 23–25                    | SNRA | 3,844  | 12  | 16,980.3  | 0.71 | 1 (Ref.)           |      |
|                     |                          | SPRA | 9,496  | 48  | 43,019.9  | 1.12 | 1.58 (0.84 - 2.97) |      |
|                     | 25–30                    | SNRA | 4,501  | 24  | 19,773.4  | 1.21 | 1 (Ref.)           |      |
|                     |                          | SPRA | 10,219 | 69  | 45,079.7  | 1.53 | 1.24 (0.78 - 1.98) |      |
|                     | $\geq$ 30                | SNRA | 663    | 2   | 2,871.7   | 0.70 | 1 (Ref.)           |      |
|                     |                          | SPRA | 1,243  | 6   | 5,340.0   | 1.12 | 1.59 (0.32 - 7.86) |      |
| Diabetes            | No                       | SNRA | 13,419 | 46  | 59,566.3  | 0.77 | 1 (Ref.)           | .319 |
|                     |                          | SPRA | 33,870 | 183 | 153,733.1 | 1.19 | 1.49 (1.08 - 2.07) |      |
|                     | Yes                      | SNRA | 2,251  | 10  | 9,237.7   | 1.08 | 1 (Ref.)           |      |
|                     |                          | SPRA | 5,140  | 51  | 21,045.5  | 2.42 | 2.19 (1.11 - 4.31) |      |
| Hypertension        | No                       | SNRA | 8,686  | 22  | 38,431.9  | 0.57 | 1 (Ref.)           | .508 |
|                     |                          | SPRA | 22,998 | 90  | 104,821.1 | 0.86 | 1.42 (0.89 - 2.27) |      |
|                     | Yes                      | SNRA | 6,984  | 34  | 30,372.1  | 1.12 | 1 (Ref.)           |      |

|                        |     |      |        |     |           |      |                     |      |
|------------------------|-----|------|--------|-----|-----------|------|---------------------|------|
|                        |     | SPRA | 16,012 | 144 | 69,957.5  | 2.06 | 1.74 (1.20 - 2.53)  |      |
| Dyslipidemia           | No  | SNRA | 9,801  | 28  | 44,175.5  | 0.63 | 1 (Ref.)            | .842 |
|                        |     | SPRA | 26,182 | 132 | 120,955.4 | 1.09 | 1.57 (1.04 - 2.36)  |      |
|                        | Yes | SNRA | 5,869  | 28  | 24,628.5  | 1.14 | 1 (Ref.)            |      |
|                        |     | SPRA | 12,828 | 102 | 53,823.2  | 1.90 | 1.66 (1.09 - 2.53)  |      |
| Chronic kidney disease | No  | SNRA | 14,169 | 48  | 62,468.9  | 0.77 | 1 (Ref.)            | .838 |
|                        |     | SPRA | 35,792 | 200 | 160,513.3 | 1.25 | 1.59 (1.16 - 2.19)  |      |
|                        | Yes | SNRA | 1,501  | 8   | 6,335.1   | 1.26 | 1 (Ref.)            |      |
|                        |     | SPRA | 3,218  | 34  | 14,265.3  | 2.38 | 1.74 (0.80 - 3.76)  |      |
| Myocardial infarction  | No  | SNRA | 15,481 | 56  | 68,059.7  | 0.82 | 1 (Ref.)            | N/A  |
|                        |     | SPRA | 38,588 | 231 | 173,134.9 | 1.33 | 1.59 (1.19 - 2.14)  |      |
|                        | Yes | SNRA | 189    | 0   | 744.3     | 0.00 | N/A                 |      |
|                        |     | SPRA | 422    | 3   | 1,643.8   | 1.83 | N/A                 |      |
| Stroke                 | No  | SNRA | 15,508 | 55  | 68,156.7  | 0.81 | 1 (Ref.)            | .857 |
|                        |     | SPRA | 38,659 | 229 | 173,299.4 | 1.32 | 1.61 (1.20 - 2.16)  |      |
|                        | Yes | SNRA | 162    | 1   | 647.3     | 1.55 | 1 (Ref.)            |      |
|                        |     | SPRA | 351    | 5   | 1,479.2   | 3.38 | 1.96 (0.23 - 16.82) |      |
| Depression             | No  | SNRA | 13,241 | 37  | 58,354.5  | 0.63 | 1 (Ref.)            | .314 |
|                        |     | SPRA | 33,746 | 177 | 152,637.8 | 1.16 | 1.78 (1.25 - 2.54)  |      |
|                        | Yes | SNRA | 2,429  | 19  | 10,449.5  | 1.82 | 1 (Ref.)            |      |
|                        |     | SPRA | 5,264  | 57  | 22,140.9  | 2.57 | 1.29 (0.77 - 2.17)  |      |

PY: person-years; aHR: adjusted hazard ratio; CI: confidence interval

Hazard ratio was calculated adjusting for age, sex, smoking, alcohol drinking, physical activity, low income, BMI, diabetes mellitus, hypertension, hyperlipidemia, chronic kidney disease myocardial infarction, stroke, and depression

**eTable 8.** The Association of RA and Its Seropositivity With the Risk of Parkinson’s Disease According to Female Reproductive Factors

|                                       |         | N       | Event<br>(N) | Duration<br>(PY) | Incidence rate<br>(per 1,000 PY) | aHR (95% CI)       | <i>P</i> <sub>int</sub> |
|---------------------------------------|---------|---------|--------------|------------------|----------------------------------|--------------------|-------------------------|
| <b>By menopausal status</b>           |         |         |              |                  |                                  |                    |                         |
| No                                    | Control | 48,133  | 14           | 226,613.6        | 0.06                             | 1 (Ref.)           | .021                    |
|                                       | RA      | 8,953   | 12           | 41,991.3         | 0.29                             | 4.43 (2.05 - 9.59) |                         |
| Yes                                   | Control | 123,484 | 441          | 558,188.6        | 0.79                             | 1 (Ref.)           |                         |
|                                       | RA      | 25,387  | 164          | 112,884.3        | 1.45                             | 1.75 (1.46 - 2.10) |                         |
| <b>By age at menopause</b>            |         |         |              |                  |                                  |                    |                         |
| <50                                   | Control | 48,133  | 14           | 226,613.6        | 0.06                             | 1 (Ref.)           | .015                    |
|                                       | SNRA    | 6,459   | 8            | 30,797.5         | 0.26                             | 4.06 (1.70 -9.69)  |                         |
|                                       | SPRA    | 2,494   | 4            | 11,193.8         | 0.36                             | 5.41 (1.78 -16.4)  |                         |
| Yes                                   | Control | 123,484 | 441          | 558,188.6        | 0.79                             | 1 (Ref.)           |                         |
|                                       | SNRA    | 18,285  | 138          | 81,573.2         | 1.69                             | 2.02 (1.67 -2.46)  |                         |
|                                       | SPRA    | 7,102   | 26           | 31,311.1         | 0.83                             | 1.02 (0.68 -1.51)  |                         |
| <b>By age at menopause</b>            |         |         |              |                  |                                  |                    |                         |
| <50                                   | Control | 35,672  | 133          | 165,059.2        | 0.81                             | 1 (Ref.)           | .656                    |
|                                       | RA      | 8,052   | 56           | 36,275.6         | 1.54                             | 1.86 (1.36 -2.54)  |                         |
| ≥ 50                                  | Control | 87,812  | 308          | 393,129.4        | 0.78                             | 1 (Ref.)           |                         |
|                                       | RA      | 17,335  | 108          | 76,608.7         | 1.41                             | 1.70 (1.37 -2.13)  |                         |
| <b>By age at menopause</b>            |         |         |              |                  |                                  |                    |                         |
| <50                                   | Control | 35,672  | 133          | 165,059.2        | 0.81                             | 1 (Ref.)           | .930                    |
|                                       | SNRA    | 5,803   | 48           | 26,318.8         | 1.82                             | 2.14 (1.53 - 2.98) |                         |
|                                       | SPRA    | 2,249   | 8            | 9,956.9          | 0.80                             | 1.04 (0.51 - 2.12) |                         |
| ≥ 50                                  | Control | 87,812  | 308          | 393,129.4        | 0.78                             | 1 (Ref.)           |                         |
|                                       | SNRA    | 12,482  | 90           | 55,254.4         | 1.629                            | 1.98 (1.56 - 2.50) |                         |
|                                       | SPRA    | 4,853   | 18           | 21,354.2         | 0.843                            | 1.01 (0.63 -1.62)  |                         |
| <b>By hormone replacement therapy</b> |         |         |              |                  |                                  |                    |                         |
| No                                    | Control | 105,235 | 378          | 474,007.1        | 0.797                            | 1 (Ref.)           | .212                    |
|                                       | RA      | 20,441  | 140          | 90,291.6         | 1.551                            | 1.83 (1.51 - 2.23) |                         |
| Yes                                   | Control | 18,249  | 63           | 84,181.5         | 0.748                            | 1 (Ref.)           |                         |

|     | RA      | 4,946   | 24  | 22,592.7  | 1.062 | 1.33 (0.83 - 2.12) |      |
|-----|---------|---------|-----|-----------|-------|--------------------|------|
| No  | Control | 105,235 | 378 | 474,007.1 | 0.797 | 1 (Ref.)           | .363 |
|     | SNRA    | 14,981  | 117 | 66,419.8  | 1.762 | 2.07 (1.68 - 2.56) |      |
|     | SPRA    | 5,460   | 23  | 23,871.9  | 0.963 | 1.15 (0.75 - 1.76) |      |
| Yes | Control | 18,249  | 63  | 84,181.5  | 0.748 | 1 (Ref.)           |      |
|     | SNRA    | 3,304   | 21  | 15,153.4  | 1.386 | 1.73 (1.06 - 2.84) |      |
|     | SPRA    | 1,642   | 3   | 7,439.2   | 0.403 | 0.0 (0.16 - 1.59)  |      |

Hazard ratio was calculated adjusting for age, sex, smoking, alcohol drinking, physical activity, low income, BMI, diabetes mellitus, hypertension, hyperlipidemia, chronic kidney disease myocardial infarction, stroke, and depression



**eTable 9. Exploratory Analysis Evaluating the Risk of Parkinson’s Disease According to Exposure to Conventional Synthetic DMARDs(csDMARDs) Biologic DMARDs (bDMARDs) and Target-Specific DMARDs (tsDMARDs)**

|                                                     | N       | Event<br>(N) | Duration<br>(PY) | Incidence rate<br>(per 1,000 PY) | HR                 |
|-----------------------------------------------------|---------|--------------|------------------|----------------------------------|--------------------|
| <b>By RA status and biologic DMARDs use</b>         |         |              |                  |                                  |                    |
| Control                                             | 273,400 | 803          | 1237781.0        | 0.65                             | 1(Ref.)            |
| RA ,no bDMARDs use                                  | 50,756  | 278          | 224567.6         | 1.24                             | 1.78 (1.55 - 2.04) |
| RA, bDMARDs use                                     | 3,924   | 12           | 19015.1          | 0.63                             | 1.16 (0.65 - 2.05) |
| <b>By RA seropositivity and biologic DMARDs use</b> |         |              |                  |                                  |                    |
| Control                                             | 273,400 | 803          | 1237781.0        | 0.65                             | 1(Ref.)            |
| SPRA, no bDMARDs use                                | 35,469  | 223          | 157420.0         | 1.42                             | 2.02 (1.74 - 2.35) |
| SPRA , bDMARDs use                                  | 3,541   | 11           | 17358.6          | 0.63                             | 1.14 (0.63 - 2.10) |
| SNRA, no bDMARDs use                                | 15,287  | 55           | 67147.5          | 0.82                             | 1.20 (0.91 - 1.57) |
| SNRA, bDMARDs use                                   | 383     | 1            | 1656.5           | 0.60                             | 1.43 (0.20 -10.15) |
| <b>By RA status and tsDMARDs use</b>                |         |              |                  |                                  |                    |
| Control                                             | 273,400 | 803          | 1237781.0        | 0.65                             | 1(Ref.)            |
| RA , no tsDMARDs use                                | 54,095  | 286          | 241027.6         | 1.19                             | 1.73 (1.51 - 1.98) |
| RA, tsDMARDs use                                    | 585     | 4            | 2555.0           | 1.57                             | 3.39 (1.27 - 9.07) |
| <b>By RA seropositivity and tsDMARDs use</b>        |         |              |                  |                                  |                    |
| Control                                             | 273,400 | 803          | 1237781.0        | 0.65                             | 1(Ref.)            |
| SPRA , no tsDMARDs use                              | 38,429  | 230          | 172241.8         | 1.34                             | 1.93 (1.67 - 2.24) |
| SPRA , tsDMARDs use                                 | 581     | 4            | 2536.9           | 1.58                             | 3.40 (1.27 - 9.10) |
| SNRA , no tsDMARDs use                              | 15,666  | 56           | 68785.9          | 0.81                             | 1.20 (0.91 - 1.58) |
| SNRA, tsDMARDs use                                  | 4       | 0            | 18.1             | 0                                | N/A                |

| By RA status and bDMARDs and tsDMARDs use    |         |     |           |      |                     |
|----------------------------------------------|---------|-----|-----------|------|---------------------|
| Control                                      | 273,400 | 803 | 1237781.0 | 0.65 | 1 (Ref.)            |
| RA, no bDMARDs or tsDMARDs use               | 50,462  | 275 | 223429.4  | 1.23 | 1.77 (1.54 - 2.03)  |
| RA, bDMARDs or tsDMARDs use                  | 4,218   | 15  | 20153.2   | 0.74 | 1.38 (0.83 - 2.30)  |
| By RA seropositivity and biologic DMARDs use |         |     |           |      |                     |
| Control                                      | 273,400 | 803 | 1237781.0 | 0.65 | 1 (Ref.)            |
| SPRA, no bDMARDs or tsDMARDs use             | 35,178  | 220 | 156292.4  | 1.41 | 2.00 (1.72 - 2.33)  |
| SPRA, bDMARDs or tsDMARDs use                | 3,832   | 14  | 18486.2   | 0.76 | 1.38 (0.81 - 2.34)  |
| SNRA, no bDMARDs or tsDMARDs use             | 15,284  | 55  | 67136.9   | 0.82 | 1.20 (0.91 - 1.57)  |
| SNRA, bDMARDs or tsDMARDs use                | 386     | 1   | 1667.0    | 0.60 | 1.42 (0.12 - 10.10) |

RA: Rheumatoid arthritis; SNRA: seronegative RA, SPRA: seropositive RA; PY: person-years; N/A: not available

Hazard ratio was calculated adjusting for age, sex, smoking, alcohol drinking, physical activity, low income, BMI, diabetes mellitus, hypertension, hyperlipidemia, chronic kidney disease myocardial infarction, stroke, and depression

**e Table 10. Comparison of Baseline Characteristics Between Participants and Non-Participants of Health Checkup Within 2 Years From the Index Date.**

|                          | RA group                       |                            | <i>p</i> value | SMD   | Control Group                   |                             | <i>p</i> value | SMD   |
|--------------------------|--------------------------------|----------------------------|----------------|-------|---------------------------------|-----------------------------|----------------|-------|
|                          | Non-participants<br>(n=55,331) | Participants<br>(n=64,457) |                |       | Non-participants<br>(n=530,509) | Participants<br>(n=677,322) |                |       |
| Age, mean ± SD           | 52.3 ± 17.3                    | 56.7 ± 12.2                | <.001          | 0.294 | 51.3 ± 16.3                     | 56.0 ± 12.0                 | <.001          | 0.326 |
| 40–64                    | 41,034 (74.2)                  | 46,873 (72.7)              |                | 0.033 | 412,524 (77.8)                  | 504,198 (74.4)              |                | 0.078 |
| ≥ 65                     | 14,297 (25.8)                  | 17,584 (27.3)              |                |       | 117,985 (22.2)                  | 173,124 (25.6)              |                |       |
| Sex                      |                                |                            | <.001          | 0.040 |                                 |                             | <.001          | 0.034 |
| Male                     | 13,477 (24.4)                  | 16,823 (26.1)              |                |       | 124,457 (23.5)                  | 168,721 (24.9)              |                |       |
| Female                   | 41,854 (75.6)                  | 47,634 (73.9)              |                |       | 406,052 (76.5)                  | 508,601 (75.1)              |                |       |
| Income                   |                                |                            | <.001          | 0.114 |                                 |                             | <.001          | 0.057 |
| Low 25% + Medicaid group | 15,082 (27.3)                  | 14,393 (22.4)              |                |       | 126,686 (23.9)                  | 145,556 (21.5)              |                |       |
| Above 25%                | 40,249 (72.7)                  | 50,064 (77.7)              |                |       | 403,823 (76.1)                  | 531,766 (78.5)              |                |       |
| Diabetes Medication      | 6,192 (11.2)                   | 6,948 (10.8)               | .023           | 0.013 | 42,441 (8.0)                    | 62,652 (9.3)                | <.001          | 0.045 |
| Hypertension Medication  | 17,539 (31.7)                  | 21,709 (33.7)              | <.001          | 0.042 | 114,431 (21.6)                  | 188,092 (27.8)              | <.001          | 0.144 |
| Dyslipidemia Medication  | 10,486 (19.0)                  | 15,856 (24.6)              | <.001          | 0.137 | 63,290 (11.9)                   | 135,668 (20.0)              | <.001          | 0.222 |
| Chronic kidney disease   | 1,858 (3.4)                    | 1,457 (2.3)                | <.001          | 0.066 | 4,775 (0.9)                     | 4,335 (0.6)                 | <.001          | 0.029 |
| Myocardial infarction    | 748 (1.4)                      | 703 (1.1)                  | <.001          | 0.024 | 2,759 (0.5)                     | 3,116 (0.5)                 | <.001          | 0.009 |
| Stroke                   | 699 (1.3)                      | 599 (0.9)                  | <.001          | 0.032 | 3,236 (0.6)                     | 3,251 (0.5)                 | <.001          | 0.018 |
| Depression               | 7,301 (13.2)                   | 8,657 (13.4)               | .240           | 0.007 | 26,101 (4.9)                    | 36,846 (5.4)                | <.001          | 0.024 |

aHR: adjusted hazard ratio; CI: confidence interval; RA: rheumatoid arthritis, SMD: standardized mean difference
