# Supplementary material
Source: PubMed Central journal article supplement (PMC10152376)
Supplement: jamaneurol-e230932-s002.pdf [file jamaneurol-e230932-s002.pdf]

## **Data Sharing Statement**

### **Data**

**Data available:** No

### **Additional Information**

**Explanation for why data not available:** Restrictions apply to the availability of these data, which were used under license for this study.
